# Supplementary material for: Computational design, synthesis and utilization of a magnetic molecularly imprinted polymer on graphene oxide nanosheets for highly selective extraction and determination of buprenorphine in biological fluids and tablets
Source: Royal Society of Chemistry journal article supplement (doi:10.1039/c8ay01757c), 2018-01-01

**Computational Design, Synthesis and Utilization of a Magnetic Molecularly Imprinted  
Polymer on Graphene Oxide Nanosheets for Highly Selective Extraction and  
Determination of Buprenorphine in Biological Fluids and Tablet**

**Farideh Ganjavi<sup>1</sup>, Mehdi Ansari<sup>2</sup>, Maryam Kazemipour<sup>\*,1</sup>, Leila Zeidabadinejad<sup>1</sup>**

*<sup>1</sup>Department of Chemistry, Kerman Branch, Islamic Azad University, Kerman, Iran*

*<sup>2</sup>Department of Drug and Food Control, Faculty of Pharmacy, Kerman University of Medical Sciences,  
Kerman, Iran*

**Table 1S**

Comparison of the proposed method with other methods applied for extraction and determination of BUP.

| Method                    | LOD   | LOQ   | DLR       | RSD (%) | Reference    |
|---------------------------|-------|-------|-----------|---------|--------------|
| MMISPE- HPLC-UV           | 0.6   | 2.5   | 2.5-500   | < 8.2   | Present work |
| MISPE- HPLC-UV            | 3.0   | 10.0  | 10-500    | < 6.5   | [1]          |
| EME-CE <sup>a</sup> -UV   | 1.0   | 3.0   | 3-700     | < 3.8   | [2]          |
| LLE-HPLC-FLD <sup>b</sup> | 1.0   | 3.0   | 3-300     | -       | [3]          |
| LLE-HPLC-UV               | -     | 2.0   | 2-50      | < 4.9   | [4]          |
| SPE-LC-MS/MS <sup>c</sup> | 0.002 | 0.007 | 0.01-5.0  | < 4.0   | [5]          |
| LLE-LC-MS/MS              | 0.83  | 5.00  | 5.00-1000 | 6.6     | [6]          |

<sup>a</sup> Electro membrane extraction-capillary electrophoresis

<sup>b</sup> Fluorescence detection

<sup>c</sup> liquid chromatography-tandem mass spectrometry

All concentrations are based on  $\mu\text{g L}^{-1}$ .

[1] F. Ganjavi, M. Ansari, M. Kazemipour, L. Zeidabadinejad, Computer-aided design and synthesis of a highly selective molecularly imprinted polymer for the extraction and determination of buprenorphine in biological fluids, *J. Sep. Sci.* (2017) 10.1002/jssc.201700213.

[2] K.S. Hasheminasab, A.R. Fakhari, Development and application of carbon nanotubes assisted electromembrane extraction (CNTs/EME) for the determination of buprenorphine as a model of basic drugs from urine samples, *Anal. Chim. Acta* 767 (2013) 75-80.

[3] S.T. Ho, J.J. Wang, W. Ho, O.Y.P. Hu, Determination of buprenorphine by high-performance liquid chromatography with fluorescence detection: application to human and rabbit pharmacokinetic studies, *J. Chromatogr. B* 570 (1991) 339-350.

[4] F. Lagrange, F. Pehourcq, M. Baumevieille, B. Begaud, Determination of buprenorphine in plasma by liquid chromatography: application to heroin-dependent subjects, *J. Pharm. Biomed. Anal.* 16 (1998) 1295-1300.

[5] A. Ceccato, R. Klinkenberg, P. Hubert, B. Streel, Sensitive determination of buprenorphine and its N-dealkylated metabolite norbuprenorphine in human plasma by liquid

chromatography coupled to tandem mass spectrometry, J. Pharm. Biomed. Anal. 32 (2003) 619-631.

[6] H.R. Lin, C.L. Chen, C.L. Huang, S.T. Chen, A.C. Lua, Simultaneous determination of opiates, methadone, buprenorphine and metabolites in human urine by superficially porous liquid chromatography tandem mass spectrometry, J. Chromatogr. B, 925 (2013) 10-15.

**Fig. 1S:** The most stable structures of (a) BUP-(AA)<sub>5</sub>-(EGDMA)<sub>35</sub>, (b) GO and GO@Fe<sub>3</sub>O<sub>4</sub>@vinyl.

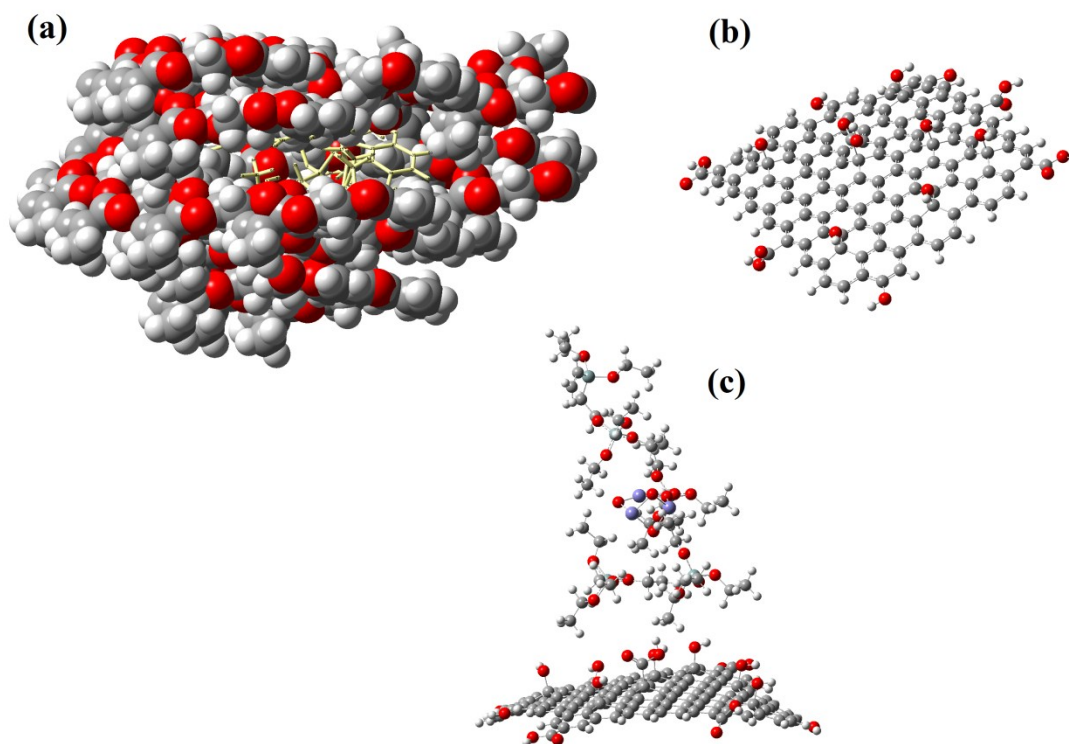

**Fig. 2S:** Electron density surface maps with electrostatic potential surface for (a) 3-VTES, (b)  $\text{Fe}_3\text{O}_4@\text{vinyl}$  and (c) EGDMA

**(a)**

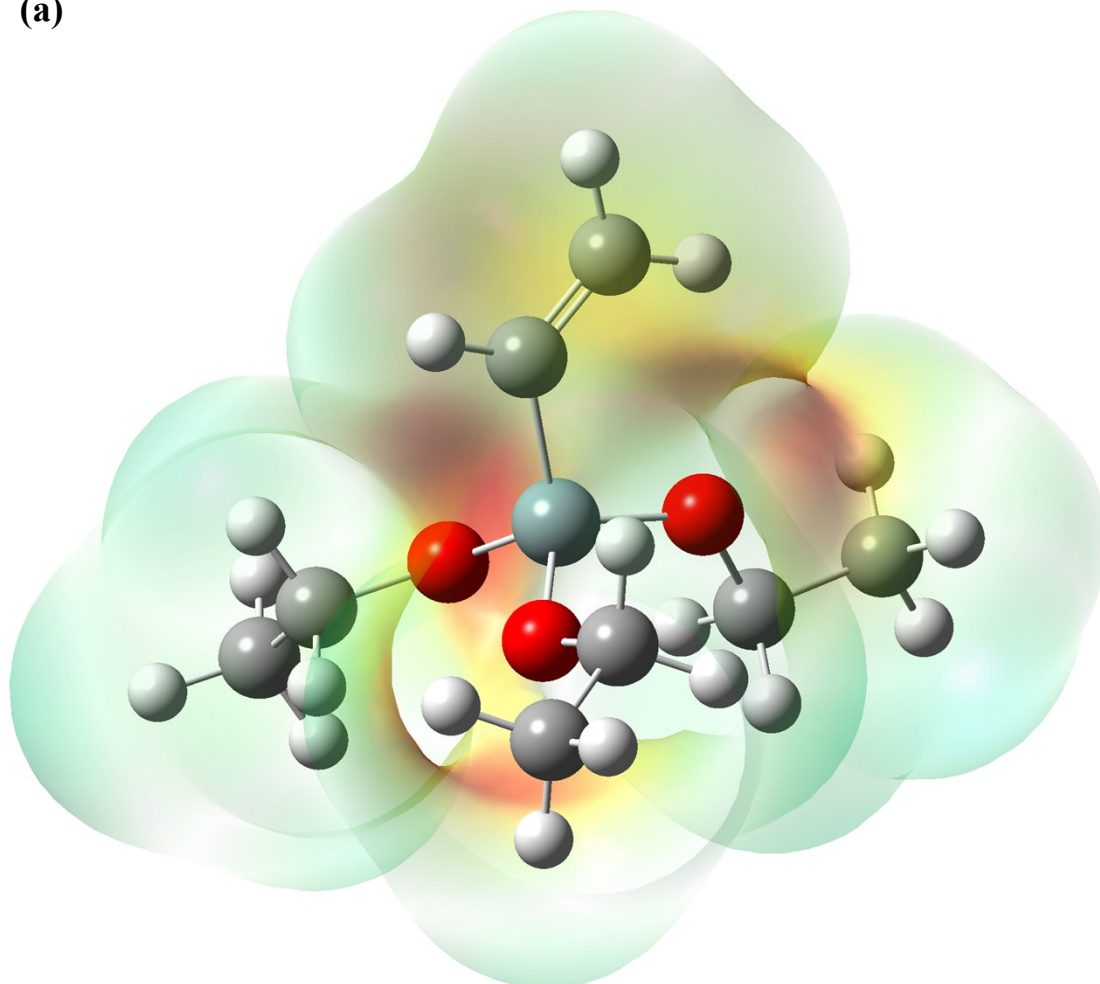

(b)

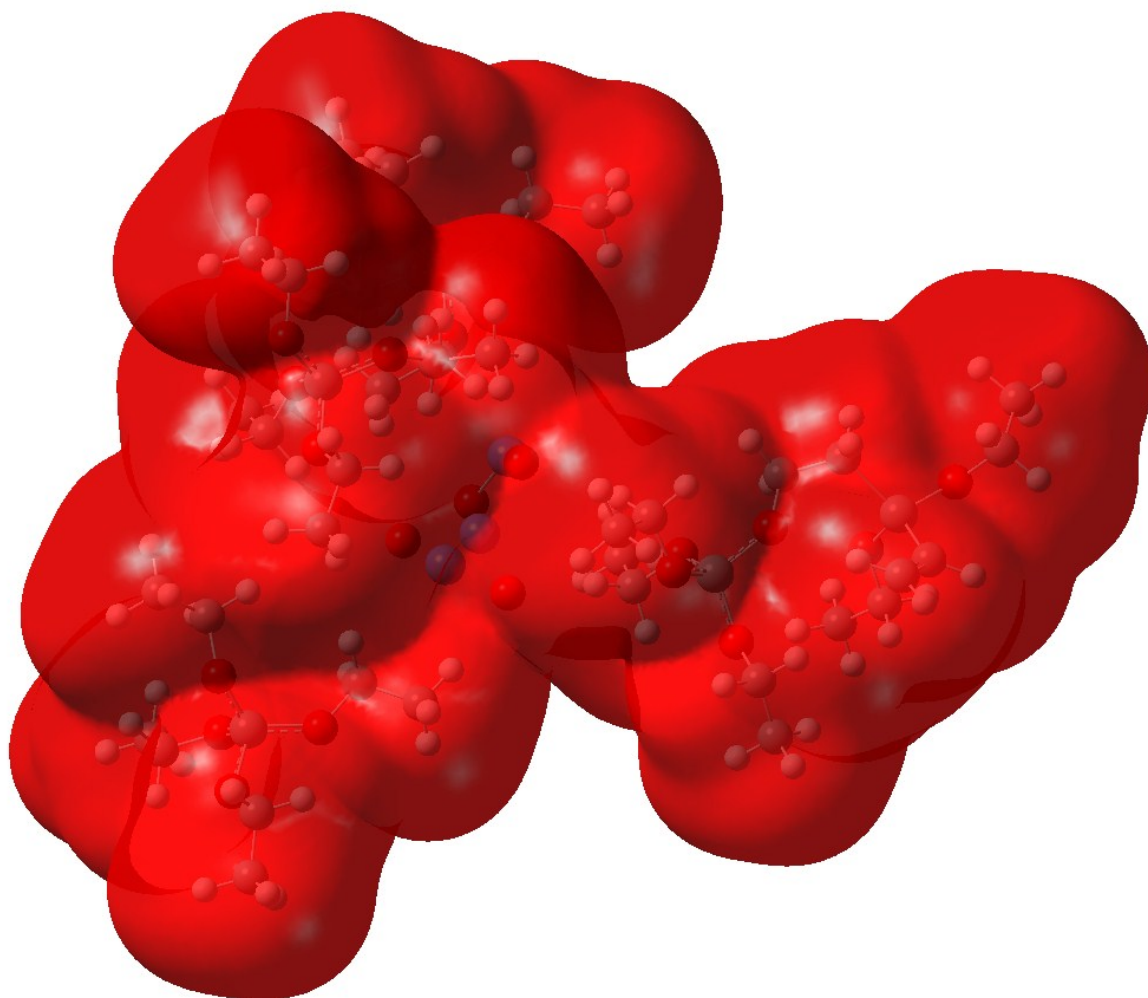

(c)

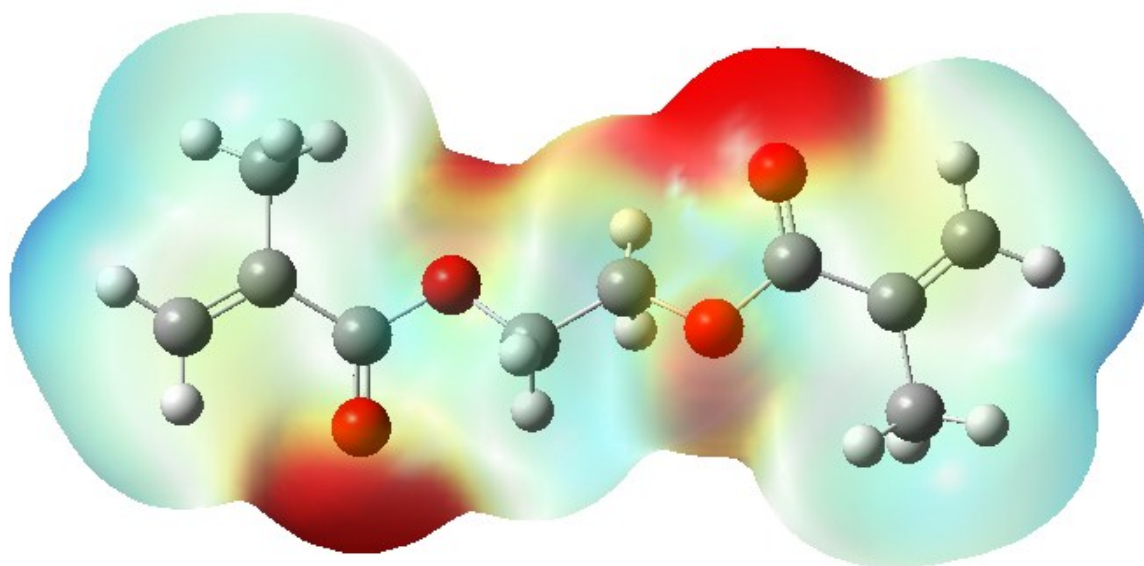

**Fig. 3S:** Hydrogen bonding between GO@Fe<sub>3</sub>O<sub>4</sub>@vinyl and EGDMA.

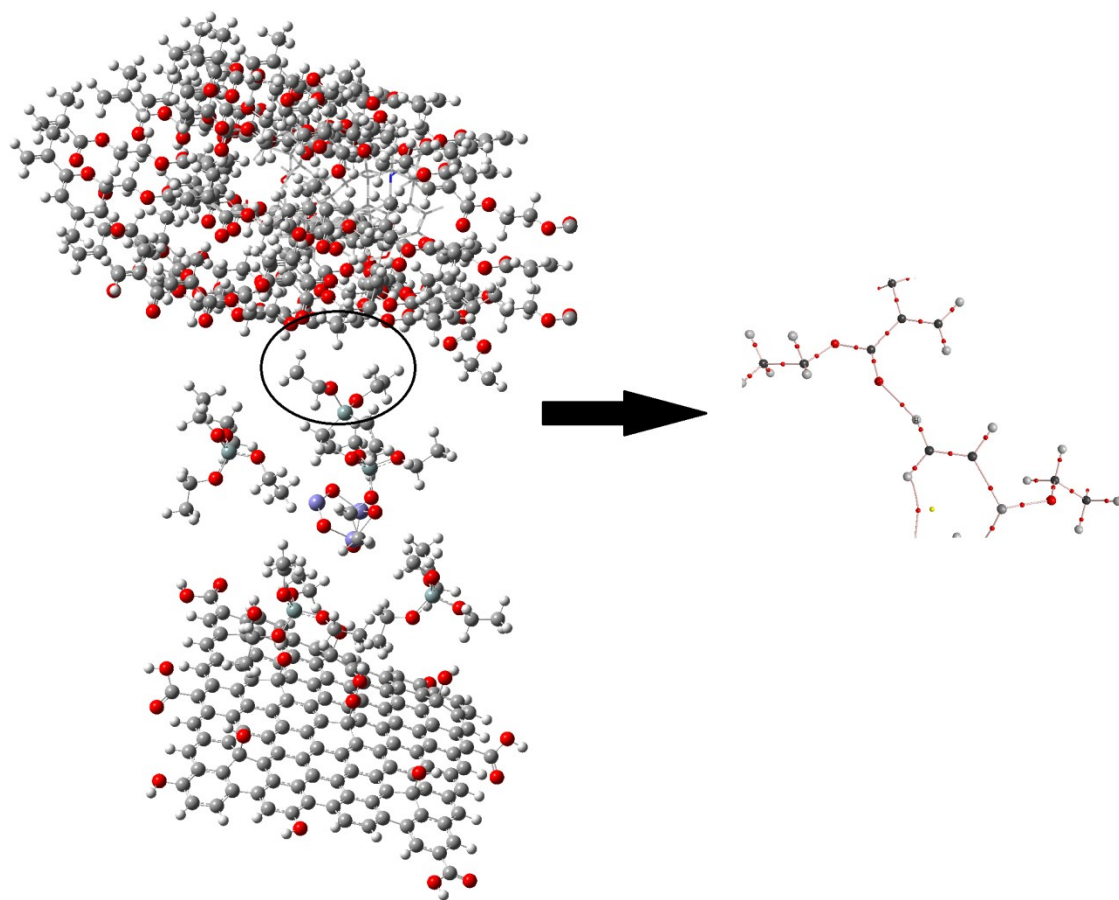

**Fig. 4S:** FT-IR spectra of (a) GO@Fe<sub>3</sub>O<sub>4</sub>, (b) GO@Fe<sub>3</sub>O<sub>4</sub>@3-VTES and (c) MMIP composites.

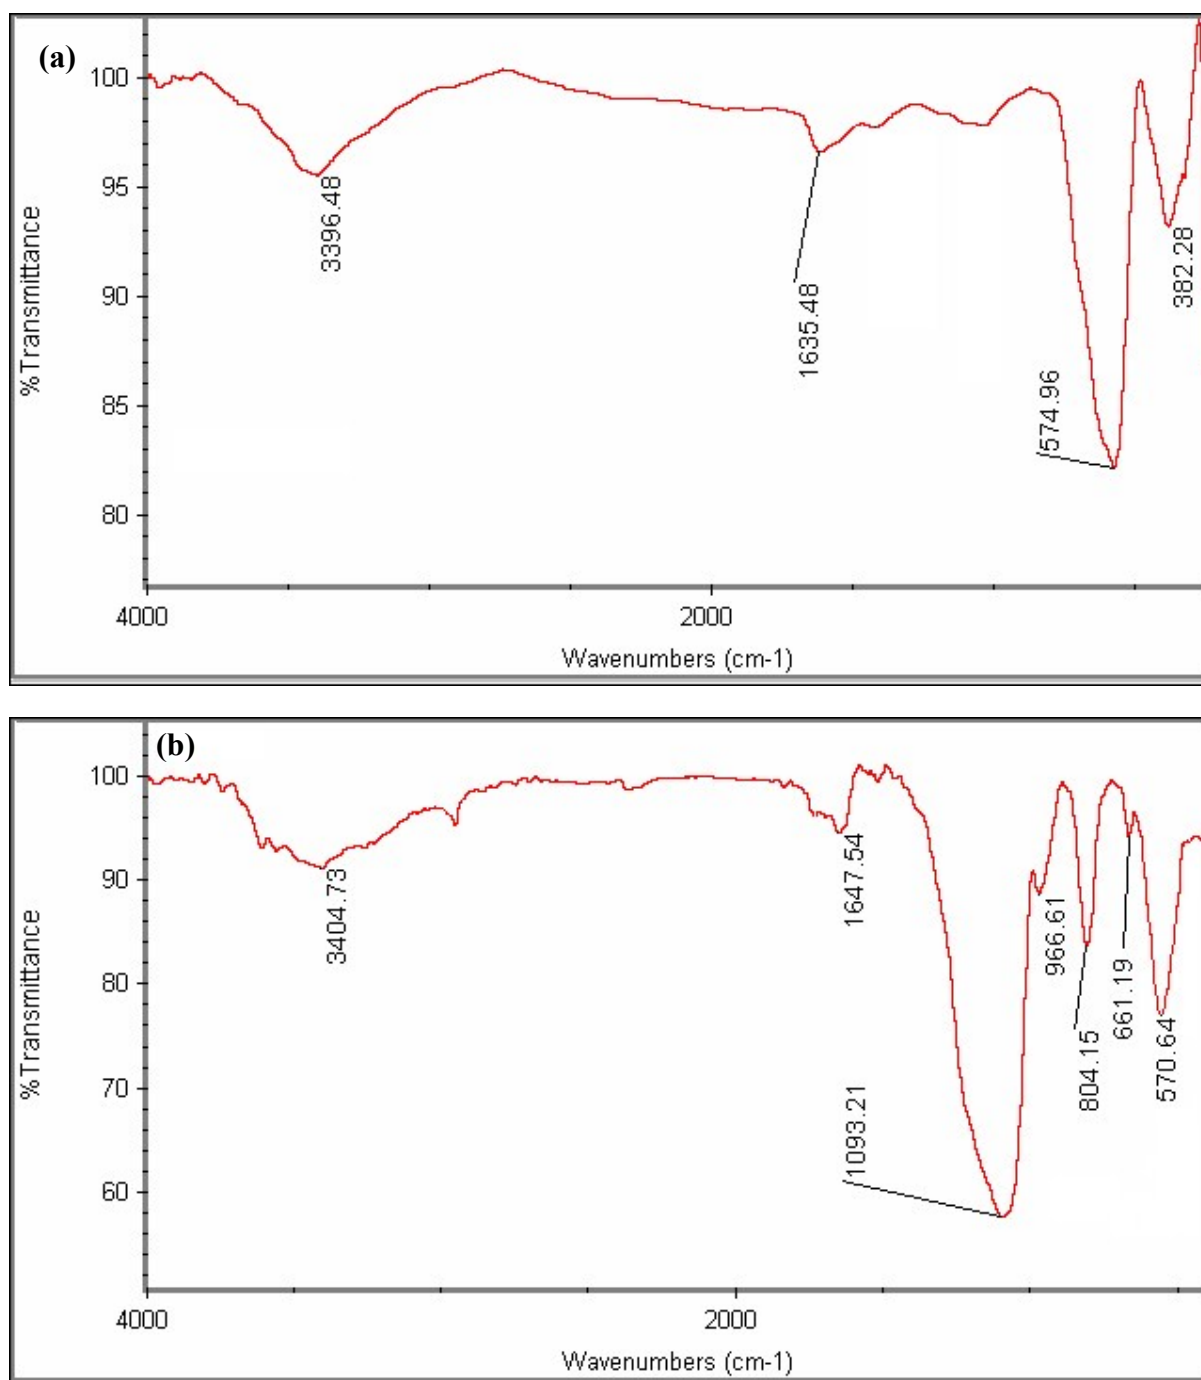



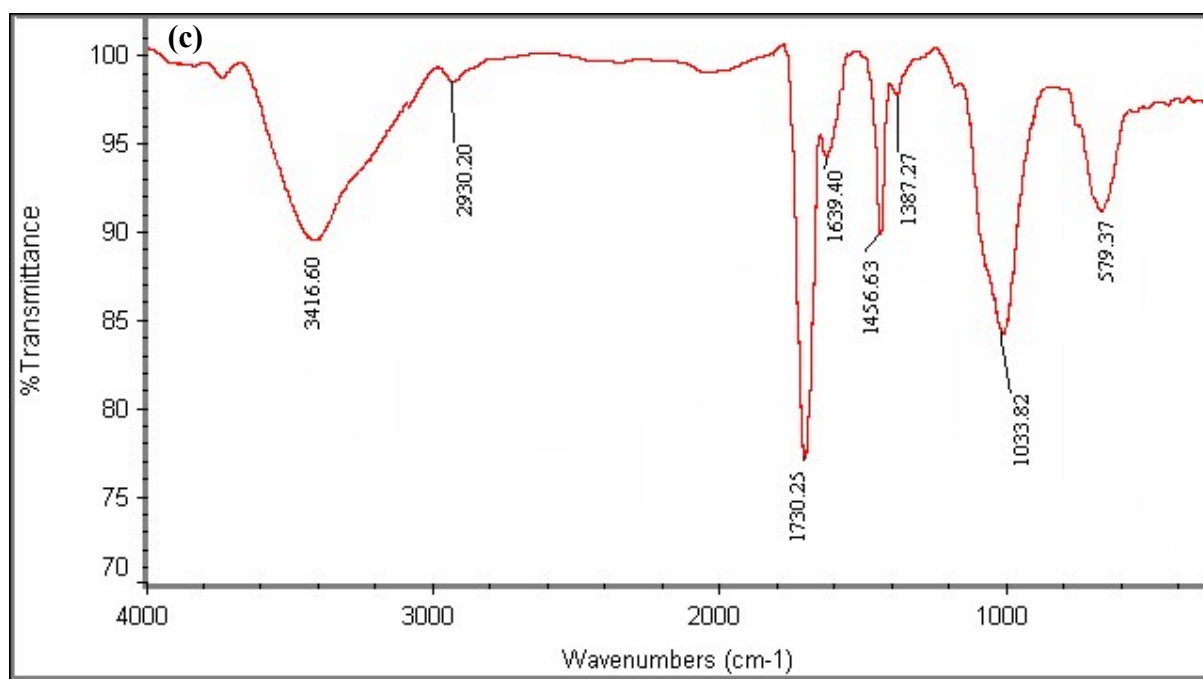

Supplement: c8ay01757c1.pdf [file c8ay01757c1.pdf]
